# Supplementary material
Source: HighWire-hosted journal article supplement (https://openres.ersjournals.com/content/9/3/00506-2022)
Supplement: inline-supplementary-material-1 [file inline-supplementary-material-1.pdf]

**Table S1.** The mean values for the basic clinical characteristics of 30-79-year-old OSA patients according to sleep study method (PSG = polysomnography or PG = cardiorespiratory polygraphy) in ten-year age groups and the p-values for the differences. The 95% CIs are presented in parentheses.

| Age group                       |                                   | PSG                 | PG                  | p-value |
|---------------------------------|-----------------------------------|---------------------|---------------------|---------|
| <b>30-39 years</b><br>n = 2,473 | <b>BMI (kg/m<sup>2</sup>)</b>     | 32.08 (31.72-32.45) | 33.62 (33.16-34.08) | <0.001  |
|                                 | <b>ESS score</b>                  | 10.44 (10.13-10.72) | 10.10 (9.78-10.41)  | 0.111   |
|                                 | <b>AHI (events/h)</b>             | 37.60 (36.03-39.18) | 32.11 (30.44-33.78) | <0.001  |
|                                 | <b>Mean SpO<sub>2</sub> (%)</b>   | 93.29 (93.10-93.48) | 92.96 (92.72-93.20) | 0.035   |
|                                 | <b>Lowest SpO<sub>2</sub> (%)</b> | 80.47 (79.90-81.04) | 78.89 (78.26-79.52) | <0.001  |
|                                 | <b>ODI (events/hour)</b>          | 32.48 (30.81-34.15) | 29.97 (28.22-31.72) | 0.042   |
|                                 | <b>CGI-S</b>                      | 1.94 (1.86-2.02)    | 2.48 (2.38-2.58)    | <0.001  |
| <b>40-49 years</b><br>n = 5,169 | <b>BMI (kg/m<sup>2</sup>)</b>     | 32.83 (32.58-33.08) | 33.72 (33.42-34.02) | <0.001  |
|                                 | <b>ESS score</b>                  | 10.47 (10.27-10.67) | 10.31 (10.09-10.52) | 0.262   |
|                                 | <b>AHI (events/h)</b>             | 39.31 (38.27-40.36) | 33.08 (32.04-34.12) | <0.001  |
|                                 | <b>Mean SpO<sub>2</sub> (%)</b>   | 92.78 (92.64-92.92) | 92.63 (92.50-92.77) | 0.137   |
|                                 | <b>Lowest SpO<sub>2</sub> (%)</b> | 79.21 (78.80-79.62) | 77.88 (77.45-78.31) | <0.001  |
|                                 | <b>ODI (events/hour)</b>          | 34.32 (33.18-35.45) | 31.41 (30.28-32.54) | <0.001  |
|                                 | <b>CGI-S</b>                      | 2.14 (2.09-2.20)    | 2.73 (2.66-2.80)    | <0.001  |
| <b>50-59 years</b><br>n = 7,426 | <b>BMI (kg/m<sup>2</sup>)</b>     | 32.38 (32.17-32.59) | 32.49 (32.27-32.70) | 0.499   |
|                                 | <b>ESS score</b>                  | 9.93 (9.76-10.10)   | 10.01 (9.84-10.19)  | 0.491   |
|                                 | <b>AHI (events/h)</b>             | 37.87 (37.08-38.67) | 31.72 (30.97-32.47) | <0.001  |
|                                 | <b>Mean SpO<sub>2</sub> (%)</b>   | 92.53 (92.42-92.64) | 92.36 (92.25-92.47) | 0.036   |
|                                 | <b>Lowest SpO<sub>2</sub> (%)</b> | 78.66 (78.33-79.00) | 77.76 (77.43-78.09) | <0.001  |
|                                 | <b>ODI (events/hour)</b>          | 32.92 (32.06-33.78) | 30.58 (29.72-31.44) | <0.001  |
|                                 | <b>CGI-S</b>                      | 2.34 (2.28-2.39)    | 2.79 (2.74-2.85)    | <0.001  |
| <b>60-69 years</b><br>n = 5,943 | <b>BMI (kg/m<sup>2</sup>)</b>     | 32.23 (32.01-32.44) | 31.81 (31.59-32.04) | 0.010   |
|                                 | <b>ESS score</b>                  | 9.38 (9.19-9.57)    | 9.10 (8.92-9.29)    | 0.043   |
|                                 | <b>AHI (events/h)</b>             | 38.04 (37.20-38.87) | 30.84 (30.07-31.61) | <0.001  |
|                                 | <b>Mean SpO<sub>2</sub> (%)</b>   | 92.13 (92.01-92.25) | 92.17 (92.05-92.29) | 0.619   |
|                                 | <b>Lowest SpO<sub>2</sub> (%)</b> | 77.97 (77.62-78.33) | 77.30 (76.94-77.66) | 0.009   |
|                                 | <b>ODI (events/hour)</b>          | 33.70 (32.78-34.62) | 29.24 (28.39-30.10) | <0.001  |
|                                 | <b>CGI-S</b>                      | 2.44 (2.38-2.51)    | 2.97 (2.91-3.04)    | <0.001  |
| <b>70-79 years</b><br>n = 2,407 | <b>BMI (kg/m<sup>2</sup>)</b>     | 31.28 (30.94-31.63) | 30.95 (30.61-31.28) | 0.170   |
|                                 | <b>ESS score</b>                  | 8.66 (8.37-8.96)    | 8.74 (8.46-9.02)    | 0.727   |
|                                 | <b>AHI (events/h)</b>             | 39.09 (37.80-40.38) | 29.98 (28.89-31.06) | <0.001  |
|                                 | <b>Mean SpO<sub>2</sub> (%)</b>   | 91.65 (91.46-91.84) | 92.02 (91.84-92.21) | 0.005   |
|                                 | <b>Lowest SpO<sub>2</sub> (%)</b> | 77.63 (77.10-78.17) | 77.66 (77.15-78.18) | 0.939   |
|                                 | <b>ODI (events/hour)</b>          | 36.07 (34.60-37.55) | 28.09 (26.90-29.27) | <0.001  |
|                                 | <b>CGI-S</b>                      | 2.72 (2.62-2.83)    | 2.94 (2.84-3.03)    | 0.004   |

Abbreviations: AHI = apnoea-hypopnoea index, BMI = body mass index, CGI-S = Clinical Global Impression Severity, ESS = Epworth Sleepiness Scale, ODI = Oxygen Desaturation Index, SpO<sub>2</sub> = Oxygen saturation
