# Supplementary material
Source: HighWire-hosted journal article supplement (https://openres.ersjournals.com/content/9/3/00506-2022)
Supplement: inline-supplementary-material-2 [file inline-supplementary-material-2.pdf]

**Table S2.** Predictors of PAP compliance at first control visit in the younger ten-year age-groups.

| Age-group (years) | Factor                        | $\beta$ | 95% CI         | Standardized $\beta$ | p-value |
|-------------------|-------------------------------|---------|----------------|----------------------|---------|
| <b>30-39</b>      | <b>Gender</b>                 | 0.141   | -0.417-0.698   | 0.023                | 0.621   |
|                   | <b>Age (years)</b>            | 0.052   | -0.013-0.118   | 0.069                | 0.119   |
|                   | <b>BMI (kg/m<sup>2</sup>)</b> | 0.016   | -0.009-0.042   | 0.063                | 0.211   |
|                   | <b>AHI (events/h)</b>         | 0.003   | -0.003-0.010   | 0.046                | 0.346   |
|                   | <b>ESS</b>                    | 0.007   | -0.027-0.040   | 0.017                | 0.701   |
|                   | <b>CGI-S</b>                  | -0.160  | -0.282- -0.038 | -0.115               | 0.010   |
| <b>40-49</b>      | <b>Gender</b>                 | -0.271  | -0.575-0.033   | -0.052               | 0.080   |
|                   | <b>Age (years)</b>            | -0.023  | -0.064-0.017   | -0.032               | 0.261   |
|                   | <b>BMI (kg/m<sup>2</sup>)</b> | 0.008   | -0.009-0.025   | 0.028                | 0.374   |
|                   | <b>AHI (events/h)</b>         | 0.011   | 0.006-0.016    | 0.141                | <0.001  |
|                   | <b>ESS</b>                    | 0.006   | -0.017-0.028   | 0.014                | 0.622   |
|                   | <b>CGI-S</b>                  | -0.177  | -0.255- -0.099 | -0.126               | <0.001  |
| <b>50-59</b>      | <b>Gender</b>                 | -0.042  | -0.259-0.174   | -0.009               | 0.701   |
|                   | <b>Age (years)</b>            | 0.021   | -0.013-0.054   | 0.028                | 0.227   |
|                   | <b>BMI (kg/m<sup>2</sup>)</b> | -0.015  | -0.030-0.001   | -0.047               | 0.064   |
|                   | <b>AHI (events/h)</b>         | 0.013   | 0.009-0.018    | 0.154                | <0.001  |
|                   | <b>ESS</b>                    | -0.029  | -0.048- -0.010 | -0.071               | 0.003   |
|                   | <b>CGI-S</b>                  | -0.144  | -0.211- -0.078 | -0.100               | <0.001  |
| <b>60-69</b>      | <b>Gender</b>                 | -0.155  | -0.390-0.079   | -0.034               | 0.265   |
|                   | <b>Age (years)</b>            | 0.000   | -0.037-0.038   | 0.001                | 0.507   |
|                   | <b>BMI (kg/m<sup>2</sup>)</b> | -0.010  | -0.029-0.008   | -0.031               | 0.317   |
|                   | <b>AHI (events/h)</b>         | 0.013   | 0.007-0.018    | 0.132                | 0.171   |
|                   | <b>ESS</b>                    | -0.031  | -0.053- -0.009 | -0.074               | 0.992   |
|                   | <b>CGI-S</b>                  | -0.207  | -0.281- -0.133 | -0.141               | <0.001  |

Abbreviations: AHI = apnoea-hypopnoea index, BMI = body mass index, CGI-S = Clinical Global Impression Severity scale, ESS = Epworth Sleepiness Scale
